# Supplementary material for: The grain boundary effect on mechanical and electronic transport properties of a striped borophene
Source: Royal Society of Chemistry journal article supplement (doi:10.1039/d0cp04387g), 2020-01-01
Supplement: d0cp04387g1.pdf [file d0cp04387g1.pdf]

# Grain boundary effect on mechanical and electronic transport properties of striped borophene

Jie Sun,<sup>a</sup> Jiancai Leng,<sup>a,\*</sup> Guangping Zhang<sup>b,\*</sup>

<sup>a</sup>*School of Electronic and Information Engineering (Department of Physics), Qilu University of  
Technology (Shandong Academy of Sciences), 250353 Jinan, Shandong, P. R. China*

<sup>b</sup>*Shandong Key Laboratory of Medical Physics and Image Processing, School of Physics and  
Electronics, Shandong Normal University, 250358 Jinan, Shandong, P. R. China.*

\*Corresponding authors: [jiancaileng@qlu.edu.cn](mailto:jiancaileng@qlu.edu.cn), [zhangguangping@sdu.edu.cn](mailto:zhangguangping@sdu.edu.cn)

**Section 1.** Thermal stability of (1,2)|(1,2), (2,1)|(2,1) and (3,1)|(3,1)GB.

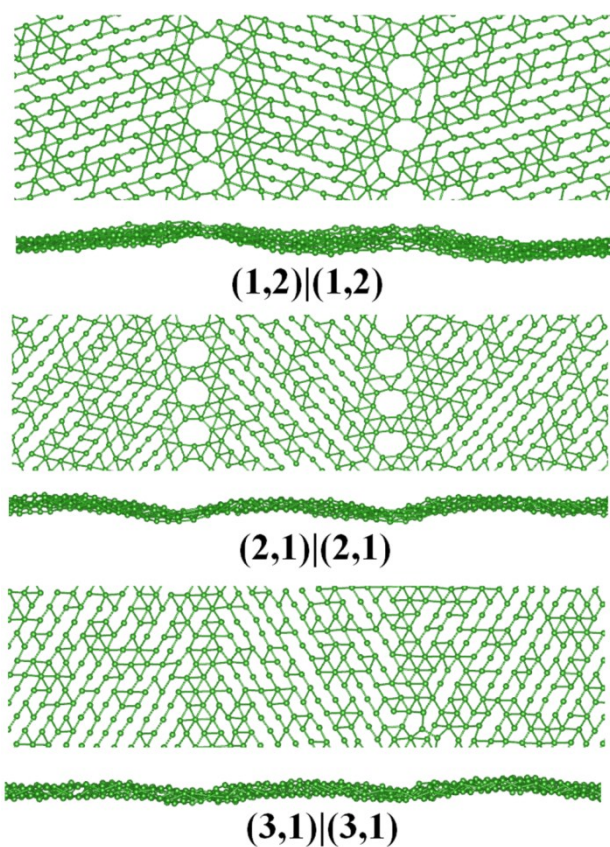

**Figure S1.** A typical snapshot in the MD trajectory for (1,2)|(1,2), (2,1)|(2,1) and (3,1)|(3,1)GB.

A first-principles MD simulation is performed at 300 K with a canonical (NVT) ensemble implemented in VASP. A supercell of (1,2)|(1,2), (2,1)|(2,1) and (3,1)|(3,1) GB containing 432, 472 and 444 atoms is individually used with a Gamma-only k-point sampling. The simulation lasts for 1.0 ps with a time step of 1.0 fs.

**Section 2.** The mechanic strength of pure borophene along x direction.

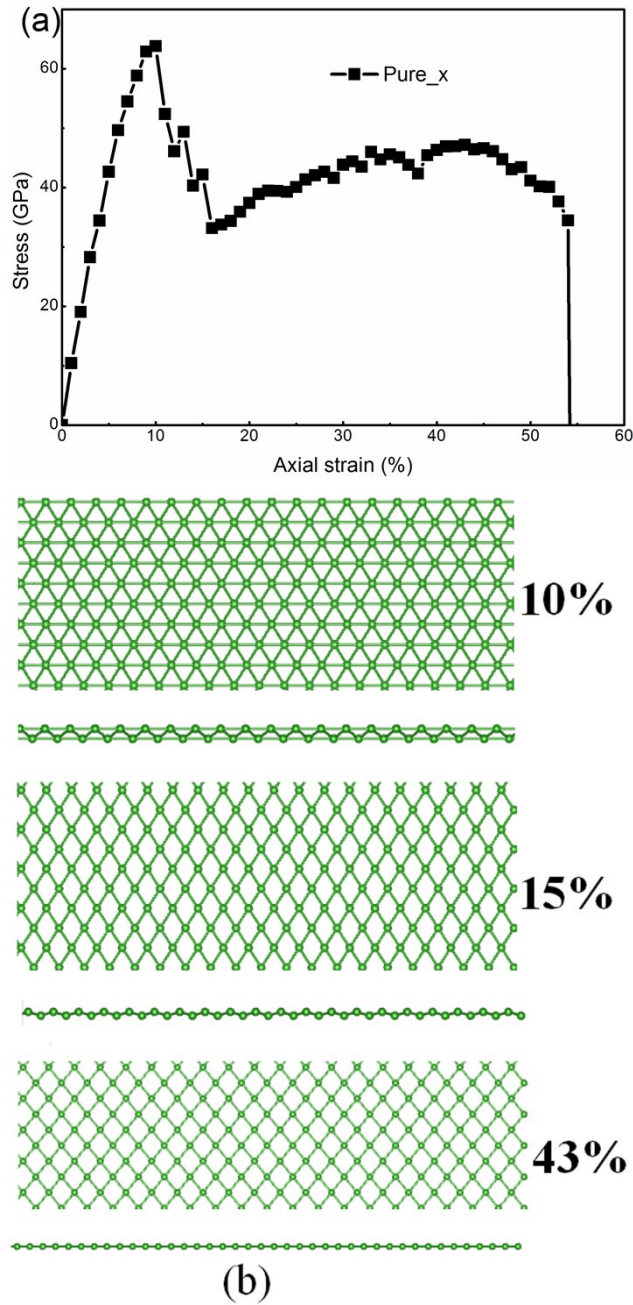

**Figure S2.** (a) The Stress-strain curves of pure borophene as the applied along x direction. (b) The geometry structures corresponding to each stress peak.
